# Supplementary material
Source: PubMed Central journal article supplement (PMC3681546)
Supplement: jn.113.177410_nutrition177410SupplementaryData1.pdf [file jn.113.177410_nutrition177410SupplementaryData1.pdf]

**Online Supporting Material**

**Supplemental TABLE 1** List of primers used for Q-PCR analysis

| Gene                       | Forward (5' to 3')       | Reverse (5' to 3')        |
|----------------------------|--------------------------|---------------------------|
| Cell cycle arrest proteins |                          |                           |
| <i>CDC2<sup>1</sup></i>    | CAGAGCTTTGGGCACTCCCAATAA | ATGGGATGCTAGGCTTCCTGGTTT  |
| <i>Cdc25A</i>              | TGAGCAACCACTGGAGGTGAAGAA | AGCTGGACTACATCCCAACAGCTT  |
| <i>CDK2</i>                | AGATGGACGGAGCTTGTTATCGCA | TGGCTTGGTCACATCCTGGAAGAA  |
| <i>CDK4</i>                | TTTGTGGCCCTCAAGAGTGTGAGA | AAAGCCTCCAGTCGCCTCAGTAAA  |
| <i>Cyclin A</i>            | ATGAGCATGTCACCGTTCCTCCTT | TCAGCTGGCTTCTTCTGAGCTTCT  |
| <i>Cyclin D1</i>           | AGAAGCTGTGCATCTACACCGACA | TGATCTGTTTGTTCCTCCGCCT    |
| <i>DPI</i>                 | AGCGCAACAGGAAAGGAGAGAAGA | TCGTCTGCCACTTCGTTGTAGGAA  |
| <i>GADD153</i>             | AGGGAGAACCAGGAAACGGAAACA | TCCTGCTTGAGCCGTTTCATTCTCT |
| Apoptosis                  |                          |                           |
| <i>AKT2</i>                | AGCACAGGTTCTTCCTCAGCATCA | TGATTGTGATGGACTGGGCGGTAA  |
| <i>Bcl-2</i>               | GCATGCGGCCTCTGTTTGATTCT  | AGGCATGTTGACTTCACTTGTGGC  |
| <i>Caspase-3</i>           | TCATTATTCAGGCCTGCCGTGGTA | TGGATGAACCAGGAGCCATCCTTT  |
| <i>c-jun</i>               | GGAACAGGTGGCACAGCTTAAACA | TTGCAACTGCTGCGTTAGCATGAG  |
| <i>FoxO1</i>               | GCTGCATCCATGGACAACAACAGT | TGAGCTAGTTCGAGGGCGAAATGT  |
| <i>p19</i>                 | TCGTGGTTCACATCTCGTGGTTCA | CCCATCATCATGACCTGGTCTTCT  |
| <i>p21</i>                 | TCAAAGGCCCGCTCTACATCTTCT | TAGGAACCTCTCATTCAACCGCCT  |
| <i>P38</i>                 | TGTCGACTTGCTGGAGAAGATGCT | TCATAAGGATCGGCCACTGGTTCA  |
| <i>P53</i>                 | GCCGTCCCAAGCAATGGATGATTT | TCTGGCATTCTGGGAGCTTCATCT  |
| Selenoproteins             |                          |                           |
| <i>Dio1</i>                | TGGTCGTGGGTAAAGTGCTTCTGA |                           |

---

|               |                                                                                  |
|---------------|----------------------------------------------------------------------------------|
| <i>Gpx1</i>   | TGGTATCCAGTTGTCGTGGCTGAA<br>TCAGGAGAACGCCAAGAACGAAGA<br>TCTCGAAGAGCATGAAGTTGGGCT |
| <i>Gpx2</i>   | AGCTCTGGGCCTTCACAGAATGAT<br>TCCACACCTGCCCTTTATTGGTCT                             |
| <i>Gpx3</i>   | AGTGGCACCATTTACGAGTACGGA<br>AAGCCCAGAATGACCAGACCGAAT                             |
| <i>Gpx4</i>   | ATACGCTGAGTGTGGTTTGCGGAT<br>ATCGAATTTGACGTTGTAGCCCGC                             |
| <i>Selh</i>   | ACGCAAACCTCAAATTCCTGAGCC<br>TCAGCATGAGGGCTTCTACCCAAA                             |
| <i>Selk</i>   | ATCAATCATCTGCGTGGCCCTAGT<br>TGAGGACACAGAGCAGTCCTTGTT                             |
| <i>Selm</i>   | ATGACAGCTGAACCGCCTAAAGGA<br>AGGGAGGTGTTTCATCACCAGGTT                             |
| <i>Selo</i>   | TTCTATGCAGCGAAGCCATGTTCC<br>TACCATCATAGAACACGTCGCGCA                             |
| <i>Sels</i>   | AATGTGGGACAGCATGCAAGAAGG<br>CCGCAAAGGCTTTCTGTCCGATTT                             |
| <i>Selt</i>   | TTCTTTGGCATGCAAGCTCCTAGC<br>TGGAAGGTGACCAGATTCCAGCTT                             |
| <i>Selv</i>   | AAAGAGCCTGGAGCAGCAATTTCC<br>ATGGACCAGTCTCCCGTTCACAAA                             |
| <i>Sep15</i>  | TTCATCGGAGGCATGCAGAGAGTT<br>TGACAGCATCCTCTGCAATCAGGA                             |
| <i>Sepn1</i>  | TCAACGAGAGCTTCATCAGCACCT<br>TTGGCATTGATGTGATGGACCACG                             |
| <i>Sepp1</i>  | AGCCAGGACCAAAGCTCCTTATGT<br>TAGATGCCTGCAGTATGCACAGGT                             |
| <i>Sepw1</i>  | ATGGCTACGTGGACACAGAAAGCA<br>AGCCACGAGAACATCAGGGAAAGA                             |
| <i>Txnrd1</i> | TTGCAATCCAGGCAGGAAGATTGC<br>AGCTTTCTCCTCAGAAAGGCCACA                             |
| <i>Txnrd2</i> | TGGACGAGATGCATCCCAGTGTTA<br>ATCCTTGAGTAACTTCGCCTGCGT                             |
|               | Control protein                                                                  |
| <i>HPRT</i>   | GGCCAGACTTTGTTGGATTTG<br>TGCGCTCATCTTAGGCTTTGT                                   |

---

<sup>1</sup>*AKT2*, RAC-beta serine/threonine-protein kinase; *Bcl-2*, B-cell lymphoma 2; *CDC2*, cyclin-dependent kinase 1; *Cdc25A*, cell division cycle 25 homolog A; *CDK2*, cyclin-dependent kinase 2; *CDK4*, cyclin-dependent kinase 4; *Dio1*, deiodinase, iodothyronine, type I; *DPI*, transcription

factor Dp-1; *FoxO1*, forkhead box O1; *GDAI153*, growth arrest and DNA damage-inducible gene 153; *Gpx1*, cytosolic glutathione peroxidase; *Gpx2*, gastro-intestinal glutathione peroxidase; *Gpx3*, plasma glutathione peroxidase; *Gpx4*, phospholipid- hydroperoxide glutathione peroxidase; *HPRT*, hypoxanthine-guanine phosphoribosyltransferase; *p19*, cyclin-dependent kinase inhibitor 2A; *p21*, cyclin-dependent kinase inhibitor 1; *p38*, mitogen-activated protein kinase p38; *p53*, tumor suppressor protein 53; *Selh*, selenoprotein H; *Selk*, selenoprotein K; *Selm*, selenoprotein M; *Selo*, selenoprotein O; *Sels*, selenoprotein S; *Selt*, selenoprotein T; *Selv*, selenoprotein V; *Sep15*, 15 kDa selenoprotein; *Sepn1*, selenoprotein N; *Sepp1*, selenoprotein P; *Sepw1*, selenoprotein W; *Txnrd1*, thioredoxin reductase-1; *Txnrd2*, thioredoxin reductase-2;

## Online Supporting Material

**Supplemental TABLE 2** Name, type, dilution, and source of primary antibodies

| Antibody       | Isotype | Dilution | Source                                    |
|----------------|---------|----------|-------------------------------------------|
| p53            | Rabbit  | 1,000    | Cell Signaling Technology (Beverly, MA)   |
| Bcl-2          | Rabbit  | 1,000    | Cell Signaling Technology (Beverly, MA)   |
| c-jun          | Rabbit  | 1,000    | Santa Cruz Biotechnology (Santa Cruz, CA) |
| Sepp1          | Rabbit  | 1,000    | Santa Cruz Biotechnology (Santa Cruz, CA) |
| Sep15          | Rabbit  | 1,000    | Abcam (Cambridge, MA)                     |
| $\beta$ -Actin | Rabbit  | 1,000    | Cell Signaling Technology (Beverly, MA)   |

## Online Supporting Material

**Supplemental TABLE 3** Stepwise regression analysis between mRNA levels of selenoprotein genes (independent variables) and cell death genes (dependent variables) in Expt. 2<sup>1</sup>

| Stepwise Regression         |                                                                                                                             | R <sup>2</sup> | P value |
|-----------------------------|-----------------------------------------------------------------------------------------------------------------------------|----------------|---------|
| DU145 cells                 |                                                                                                                             |                |         |
| <sup>2</sup> Y <sub>1</sub> | Y <sub>1</sub> =-0.086X <sub>3</sub> +1.03                                                                                  | 0.29           | 0.11    |
| Y <sub>3</sub>              | Y <sub>3</sub> =0.0022X <sub>1</sub> -0.0031X <sub>2</sub> -0.006X <sub>4</sub> +0.015                                      | 0.77           | 0.02    |
| Y <sub>4</sub>              | Y <sub>4</sub> =0.10X <sub>1</sub> -0.17X <sub>3</sub> -0.89X <sub>5</sub> +1.0                                             | 0.73           | 0.04    |
| Y <sub>5</sub>              | Y <sub>5</sub> =-0.22X <sub>2</sub> +2.27                                                                                   | 0.56           | 0.01    |
| Y <sub>6</sub>              | Y <sub>6</sub> =-0.23X <sub>2</sub> +2.78                                                                                   | 0.42           | 0.04    |
| Y <sub>7</sub>              | Y <sub>7</sub> =0.42X <sub>2</sub> -0.39X <sub>3</sub> +1.04                                                                | 0.88           | 0.00    |
| Y <sub>8</sub>              | Y <sub>8</sub> =0.04X <sub>2</sub> -0.086                                                                                   | 0.65           | 0.01    |
| Y <sub>10</sub>             | Y <sub>10</sub> =0.30X <sub>3</sub> +2.14X <sub>5</sub> -2.7X <sub>8</sub> -0.80                                            | 0.78           | 0.02    |
| Y <sub>11</sub>             | Y <sub>11</sub> =0.021X <sub>1</sub> +0.028X <sub>2</sub> +0.05X <sub>3</sub> -0.11X <sub>4</sub> -0.15X <sub>7</sub> -0.12 | 0.96           | 0.01    |
| Y <sub>12</sub>             | Y <sub>12</sub> =0.053X <sub>2</sub> +0.044                                                                                 | 0.57           | 0.01    |
| HTC116 cells                |                                                                                                                             |                |         |
| Y <sub>4</sub>              | Y <sub>4</sub> =0.014X <sub>1</sub> -0.07X <sub>6</sub> -0.19X <sub>9</sub> +1.25                                           | 1.00           | 0.02    |
| Y <sub>7</sub>              | Y <sub>7</sub> =6.84X <sub>10</sub> -325.90X <sub>11</sub> -10.53                                                           | 1.00           | 0.01    |
| Y <sub>9</sub>              | Y <sub>9</sub> =0.087X <sub>9</sub> -0.16                                                                                   | 0.93           | 0.01    |
| Y <sub>11</sub>             | Y <sub>11</sub> =-0.028X <sub>9</sub> +0.28                                                                                 | 0.70           | 0.08    |
| Y <sub>12</sub>             | Y <sub>12</sub> =4.91X <sub>7</sub> -0.12X <sub>10</sub> +0.27                                                              | 1.00           | 0.01    |

<sup>1</sup>Data were from cells treated with the control porcine serum, the Se-biofortified serum, and the MSA-balanced serum.

<sup>2</sup>Y<sub>1</sub>: DP1; Y<sub>2</sub>: Cdc2; Y<sub>3</sub>: Cdc25A; Y<sub>4</sub>: CyclinA; Y<sub>5</sub>: CDK2; Y<sub>6</sub>: CDK4; Y<sub>7</sub>: GADD153; Y<sub>8</sub>: p53;

Y<sub>9</sub>: p38; Y<sub>10</sub>: c-jun; Y<sub>11</sub>: Caspase3; Y<sub>12</sub>: FoxO1; X<sub>1</sub>: Gpx4; X<sub>2</sub>: Sep15; X<sub>3</sub>: Selt; X<sub>4</sub>: Gpx1; X<sub>5</sub>:

Sepp1; X<sub>6</sub>: Sels; X<sub>7</sub>: Txnrd2; X<sub>8</sub>: Selm; X<sub>9</sub>: Selh; X<sub>10</sub>: Selk; X<sub>11</sub>: Sepn1.

## Online Supporting Material

**Supplemental TABLE 4** Doses of selenium in various forms used in previous studies

| Forms    | Se, $\mu$ M | Cell Lines                           | Reference |
|----------|-------------|--------------------------------------|-----------|
| MSA      | 5-10        | PC-3                                 | 33        |
|          | 3-30        | LNCaP                                | 34        |
|          | 3-5         | DU145                                | 35        |
| SeMet    | 45-130      | MCF7S, DU145 and UACC375             | 31        |
|          | 32          | HT-29, HCA-7, Caco-60 and Caco-pcDNA | 32        |
|          | 25-400      | PC-3                                 | 33        |
| Sodium   | 5           | DU145                                | 35        |
| selenite | 10-100      | B16 and pB16                         | 36        |
|          | 20          | NB4                                  | 37        |

## Online Supporting Material

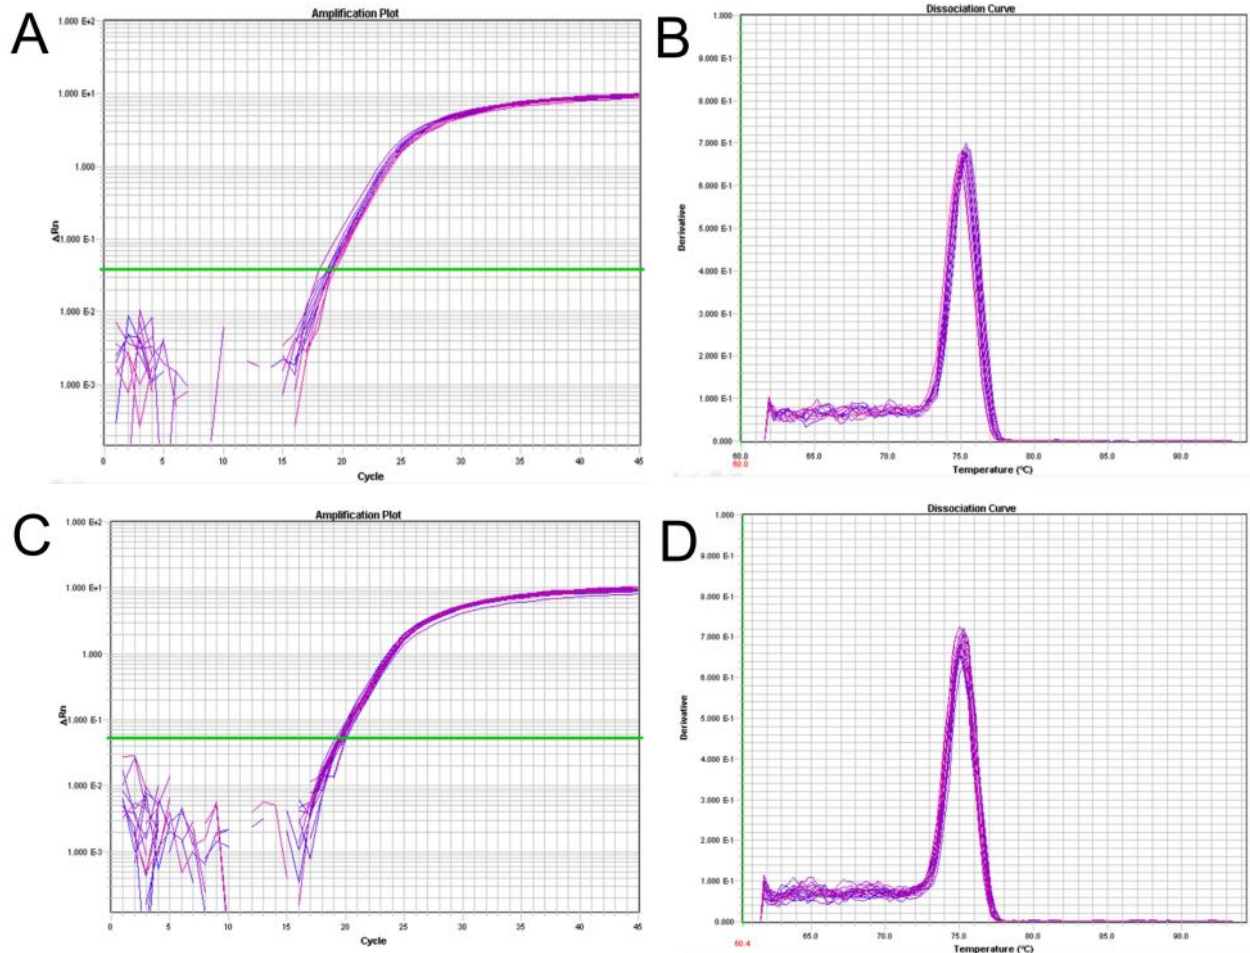

**Supplemental FIGURE 1** Amplification plots (A and C) and dissociation curves (B and D) based on Q-PCR data used to detect HPRT mRNA abundances in DU145 cells (A and B) and HCT116 cells (C and D) in Expt. 2. The assay for HPRT mRNA abundances in the five treatments (Control, Se-Y, MSA, SeMet and Selenite) was conducted simultaneously on one 384-well plate. (A and C) The cycle threshold (Ct) value was the projection of crossing point on X-axis of  $\Delta Rn$  threshold line ( $Y = 0.04-0.05$ ). The amplification plot in the increased logarithmic phase and the smaller Ct value represented the higher abundance of initial mRNA template that can be detected after less PCR cycles. (B and D) The single sharp dissociation curve cluster of HPRT represented the gene's specific amplification.

## Online Supporting Material

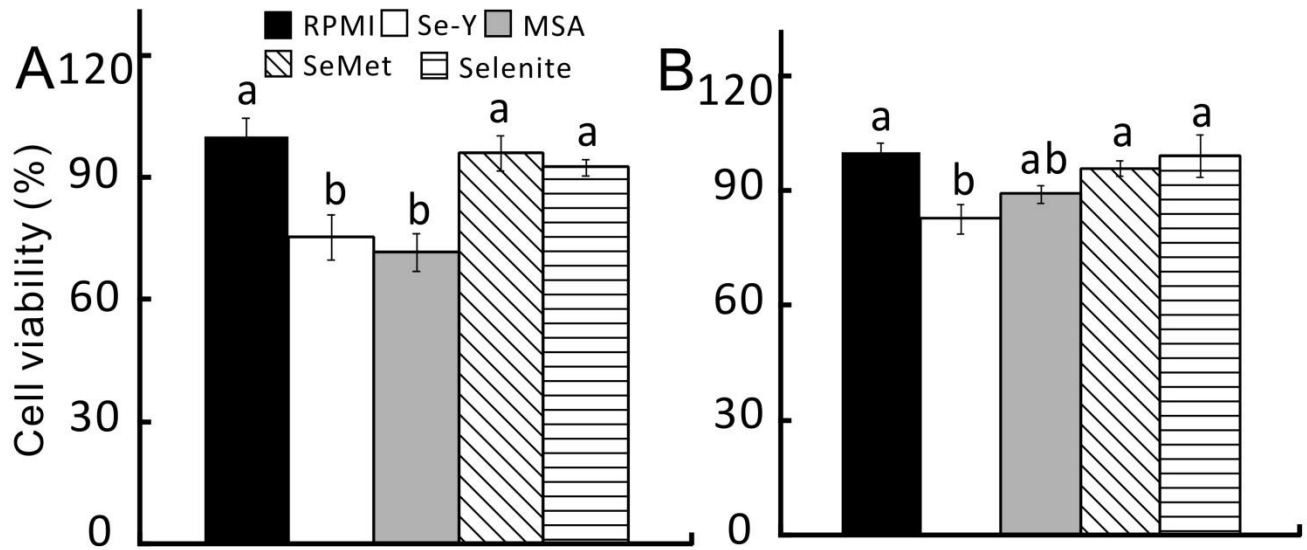

**Supplemental FIGURE 2** Effects of the Se-biofortified porcine serum (Se-Y) treatment on cell viability of the human prostate cancer cells (DU145, A) and the human colon cancer cells (HTC116, B), in comparison with the RPMI 1640 medium (supplemented with 100 IU of penicillin, 100  $\mu$ g of streptomycin/mL and 10% fetal bovine serum) or that medium was added with different Se compounds to match the Se concentration in Se-Y in Expt. 2. The cells were seeded at  $1 \times 10^4$  cells/well in 24-well plates and incubated with the designated Se sources for 144 h. Cell viability was determined using MTT assay. Data are means  $\pm$  SE, n = 5. Bars not sharing a common letter differ ( $P < 0.05$ ).



### Online Supporting Material

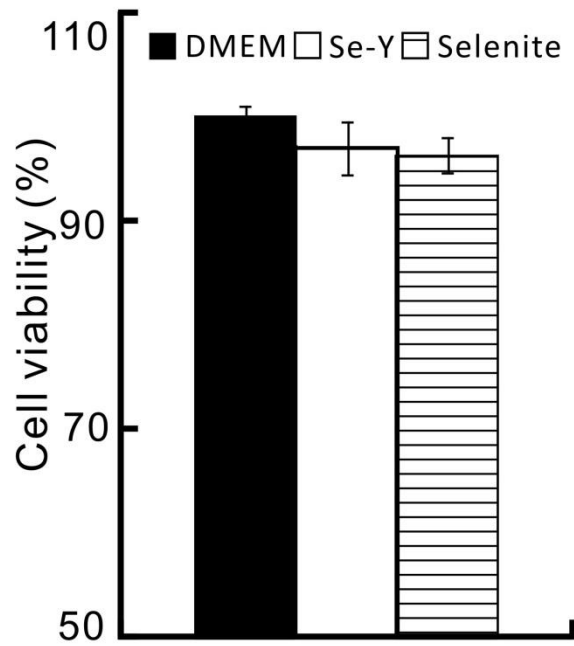

**Supplemental FIGURE 3** Effects of the Se-biofortified porcine serum (Se-Y) treatment on cell viability of the human hepatocellular carcinoma cells (HepG2), in comparison with the DMEM medium (supplemented with 100 IU of penicillin, 100 µg of streptomycin/mL and 10% fetal bovine serum) or that medium added with sodium selenite to match the Se concentration in Se-Y in Expt. 2. The cells were seeded at  $1 \times 10^4$  cells/well in 24-well plates and incubated with the designated Se sources for 36 h. Cell viability was determined using MTT assay. Data are means  $\pm$  SE, n = 6.
